# Supplementary material for: Dracunculin Inhibits Adipogenesis in Human Bone Marrow-Derived Mesenchymal Stromal Cells by Activating AMPK and Wnt/β-Catenin Signaling
Source: MDPI journal article supplement (doi:10.3390/ijms23020653), 2022-01-07
Supplement: s1 [file s1]

Dracunculin = 8-Methoxy-6,7-methylenedioxcoumarin

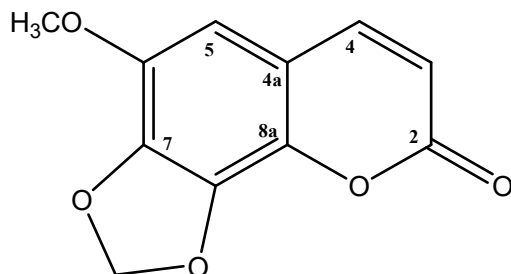

$^1\text{H}$  NMR ( $\text{CDCl}_3$ , 300 MHz)  $\delta$  7.56 (1H, d,  $J$  = 7.6 Hz, H-4), 6.57 (1H, s, H-5), 6.26 (1H, d,  $J$  = 9.6 Hz, H-3), 3.92 (3H, s, OMe);  $^{13}\text{C}$  NMR ( $\text{CDCl}_3$ , 75 MHz)  $\delta$  159.7 (C, C-2), 143.5 (CH, C-4), 141.8 (C, C-6), 139.8 (C, C-8a), 135.0 (C, C-8), 133.8 (C, C-7), 114.3 (C, C-4a), 114.2 (CH, C-3), 105.0 (CH, C-5), 103.5 ( $\text{CH}_2$ ,  $-\text{OCH}_2\text{O}-$ ), 56.8 ( $\text{CH}_3$ ,  $-\text{OMe}$ ).

References for NMR data comparison

- 1) R. D. H. Murray, and M. Stefanovic, J. Nat. Prod., 1986, 49(3), 550-551.
- 2) J. H. Kwak, W. Y. Jang, O. P. Zee, and K. R. Lee, Planta Med, 1997, 63, 474-476.
- 3) M.-U. Rashid, S. Ali, M. Alamzeb, J. Igoli, C. Clements, S. Q. Shah, V. A. Ferro, A. I. Gray, and M. R. Khan, Pharm. Biol., 2014, 52(8), 983 - 987.
